# Supplementary material for: Three-dimensional graphene oxide/polypyrrole composite electrodes fabricated by one-step electrodeposition for high performance supercapacitors
Source: Royal Society of Chemistry journal article supplement (doi:10.1039/c5ta02920a), 2015-01-01
Supplement: c5ta02920a1.pdf [file c5ta02920a1.pdf]

## Electronic Supplementary Information

### **Three-dimensional graphene oxide/polypyrrole composite electrodes fabricated by one-step electrodeposition for high performance supercapacitors**

Jianyun Cao<sup>a</sup>, Yaming Wang<sup>a,\*</sup>, Junchen Chen<sup>a</sup>, Xiaohong Li<sup>b</sup>, Frank C. Walsh<sup>c</sup>, Jia-  
Hu Ouyang<sup>a</sup>, Dechang Jia<sup>a</sup>, Yu Zhou<sup>a</sup>

<sup>a</sup> *Institute for Advanced Ceramics, Harbin Institute of Technology, Harbin 150001, China*

<sup>b</sup> *Renewable Energy Group, College of Engineering, Mathematics and Physical Sciences, University of Exeter, Penryn Campus, Cornwall TR10 9FE, UK*

<sup>c</sup> *Electrochemical Engineering Laboratory, Energy Technology Group, Faculty of Engineering and the Environment, University of Southampton, Southampton, SO17 1BJ, UK*

---

\* Corresponding author. Tel.: +86-451-86413910; fax: +86-451-86413922.  
E-mail: wangyaming@hit.edu.cn (Y.M. Wang).

## Experimental section

### *Preparation of graphene oxide (GO)*

GO used in this work was synthesized by modified hummer method and described in brief as follows: The concentrated 7.5 mL  $\text{H}_2\text{SO}_4$  in a 100 mL beaker was heated up to 80 °C.  $\text{K}_2\text{S}_2\text{O}_8$  (2.5 g) and  $\text{P}_2\text{O}_5$  (2.5 g) were added in sequence with continuous stirring until the reactants were completely dissolved. Graphite powder (5 g) was then added to above mixture. The resulting mixture was kept at 80 °C for 6 hours, after which the mixture was diluted with distilled water, filtered and washed to remove all soluble substances, and the corresponding pretreated graphite was transferred to a drying dish and left overnight under ambient conditions. Another 115 mL  $\text{H}_2\text{SO}_4$  was put into a 500 mL Erlenmeyer flask and then cooled in an ice bath. The pretreated graphite and 15 g  $\text{KMnO}_4$  were added slowly in sequence and allowed to dissolve completely. The mixture was then allowed to react at 35 °C for 2 hours, after that, 230 mL distilled water was slowly added. After stirring for 15 min, another 700 mL of distilled water was added to the mixture, thereafter 12.5 mL of 30%  $\text{H}_2\text{O}_2$  was added to the mixture. The mixture was allowed to stand for at least 12 hours then the clear supernatant was decanted. The remaining mixture was washed with 1.1 L 1:10 HCl solution followed by distilled water. Finally, it was purified by dialysis for at least one week to remove any remaining salt impurities for the following experiments.

## Calculation

### *Three-electrode configuration*

For three-electrode configuration, the area capacitance ( $C_A$ ) for the individual electrode ( $\text{F cm}^{-2}$ ) is calculated from the CV curves as follows:

$$C_A = \frac{I}{S\nu(V_c - V_a)} \int_{V_a}^{V_c} I(V) dV$$

(1) where  $S$  is the geometric area of the electrode ( $\text{cm}^2$ );  $\nu$  is the linear scan rate ( $\text{V s}^{-1}$ );  $V_c - V_a$  is the voltage window (V) during discharging (backward scan),  $I(V)$  is the resulting current (A).

$C_A$  based on galvanostatic discharge is calculated as follows:

$$C_A = \frac{I\Delta t}{S\Delta V}$$

(2) where  $I$  is the discharge current (A),  $\Delta t$  is the discharge time (s),  $\Delta V$  is the operating potential/cell voltage range exclude with the IR drop (V).

Specific capacitance ( $C_S$ ) of the electrode ( $\text{F g}^{-1}$ ) is calculated simply by dividing the

$C_A$  with the loading mass ( $m$ ) of GO/PPy composite on the electrode ( $\text{g cm}^{-2}$ ):

$$C_S = \frac{C_A}{m}$$

(3)

### ***Two electrode configuration***

For two-electrode configuration, the area capacitance ( $C_A$ ) for the individual electrode ( $\text{F cm}^{-2}$ ) is calculated from the galvanostatic charge-discharge results as follows:

$$C_A = 2 \frac{I\Delta t}{S\Delta V}$$

(4)

### ***Electrochemical impedance spectroscopy (EIS)***

The real ( $C'$ ) and imaginary ( $C''$ ) part of the area capacitance are derived from the impedance data as follows:

$$C' = \frac{-Z''}{S\omega|Z|^2}$$

(5)

$$C'' = \frac{Z'}{S\omega|Z|^2}$$

(6) Where  $Z$  is the impedance,  $S$  is the geometric area of the electrode,  $\omega$  is the angular frequency ( $\omega=2\pi f$ ).

The relaxation time  $\tau_0$  is deduced from the knee frequency ( $f_0$ ) as:

$$\tau_0 = \frac{1}{f_0}$$

(7) And  $f_0$  can be accurately defined from the peak frequency on  $C''$ - $f$  plot.

### ***Energy density and power density***

The total energy ( $E$ ) and power ( $P$ ) of the two-electrode supercapacitor device are first calculated from the galvanostatic charge-discharge results as:

$$E = \frac{1}{2}CV^2 = \frac{1}{2}IV\Delta t \quad (8)$$

$$P = \frac{E}{\Delta t} \quad (9)$$

Where  $C$  is the total capacitance stored in the device,  $V$  is the cell voltage,  $I$  is the discharge current,  $\Delta t$  is the discharge time.

Then the energy density and power density are calculated by dividing  $E$  and  $P$  with the total mass of active materials in the two electrodes, or the geometric area of the supercapacitor (1 cm<sup>2</sup> in this research).

## Supplementary Schemes

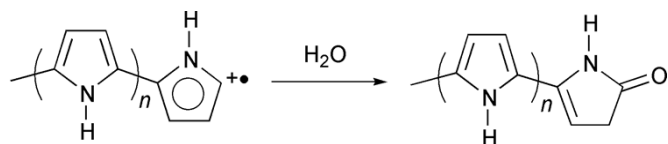

Scheme S1 Termination reaction.

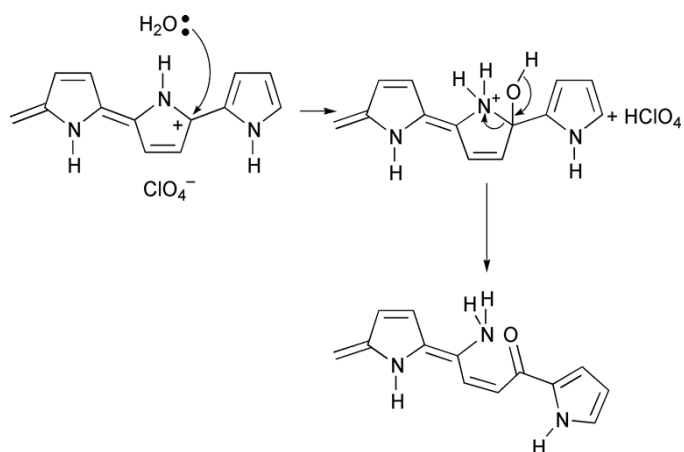

Scheme S2 Secondary reaction.

## Supplementary Figures

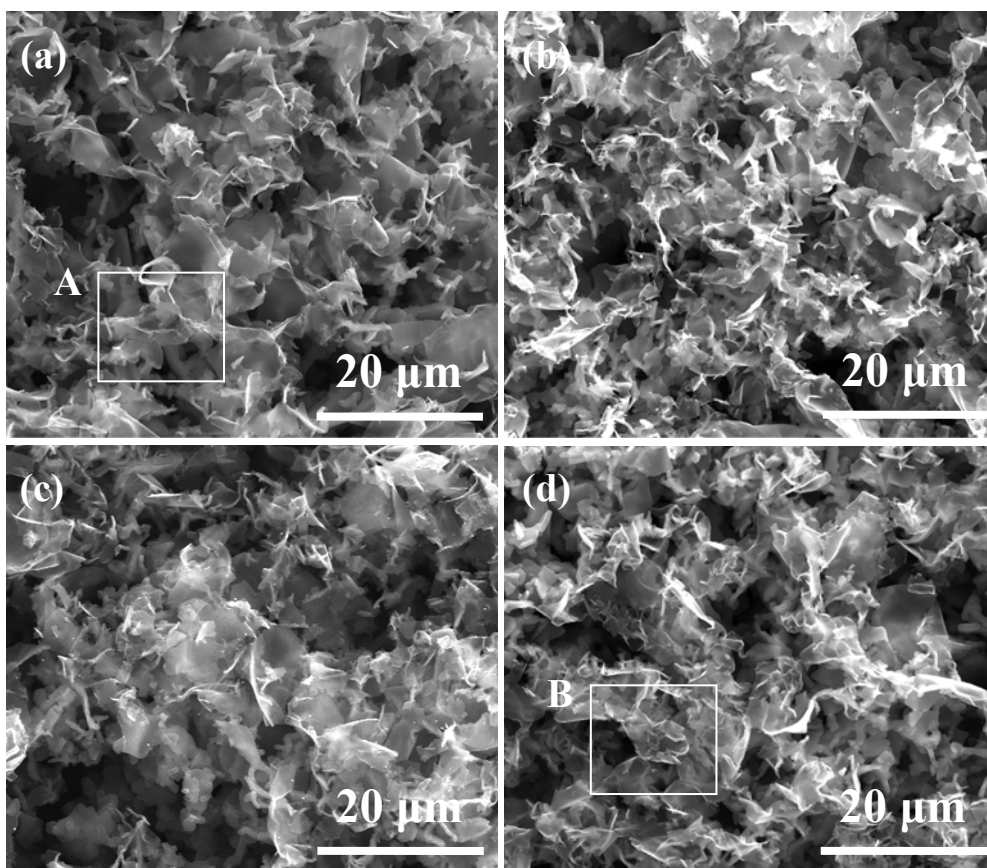

Fig. S1 SEM surface morphologies of the GO/PPy composite electrodes deposited in electrolyte with GO concentration of  $0.1 \text{ mg mL}^{-1}$  for different times: (a) 1200 s; (b) 1800 s; (c) 2400 s; (d) 2700 s. Enlarged images of area A and B are shown in Fig. S2.

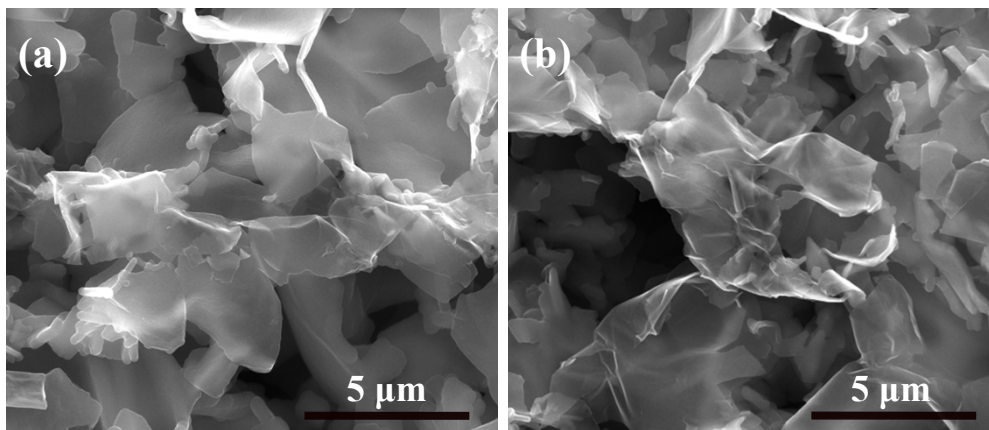

Fig. S2 High magnification SEM surface morphologies of the GO/PPy composite electrodes deposited in electrolyte with GO concentration of  $0.1 \text{ mg mL}^{-1}$  for different time: (a) 1200 s; (b) 2700 s.

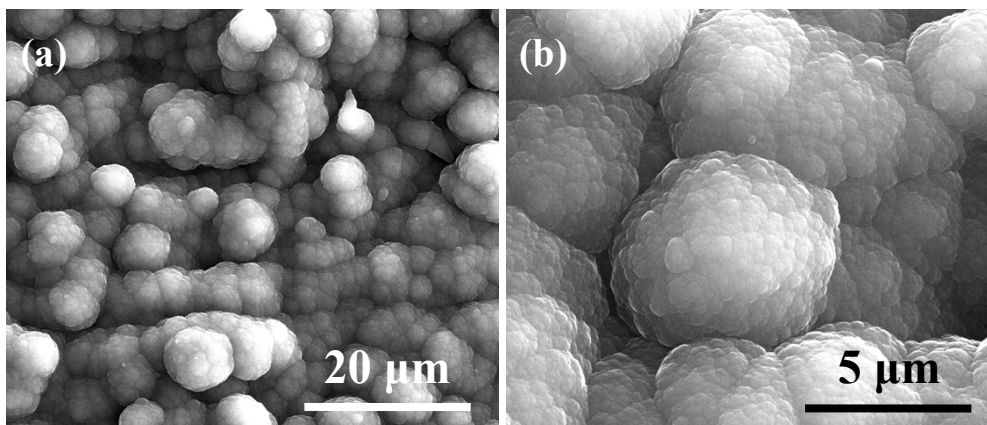

Fig. S3 SEM surface morphology of the pure PPy-1200 s electrode deposited in 5 vol.% (72 mmol L<sup>-1</sup>) pyrrole aqueous solution containing 20 mmol L<sup>-1</sup> LiClO<sub>4</sub> as supporting electrolyte: (a) low magnification; (b) high magnification.

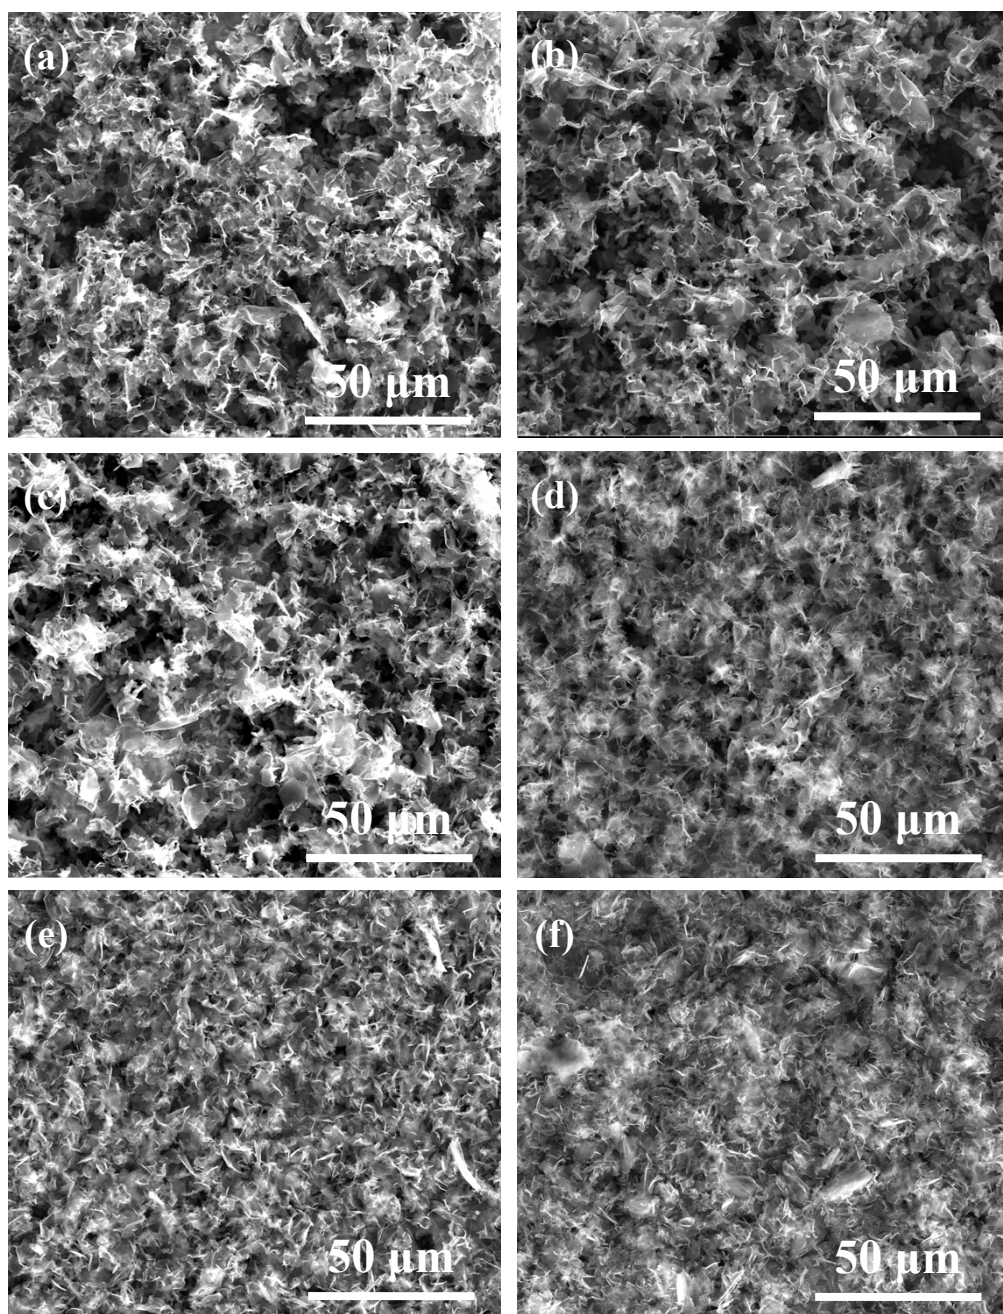

Fig. S4 SEM surface morphologies of the GO/PPy composite electrodes deposited with various GO concentrations (the deposition time is 1200 s for all the electrodes): (a) 0.05 mg mL<sup>-1</sup>; (b) 0.1 mg mL<sup>-1</sup>; (c) 0.2 mg mL<sup>-1</sup>; (d) 0.4 mg mL<sup>-1</sup>; (e) 0.8 mg mL<sup>-1</sup>; (f) 1.2 mg mL<sup>-1</sup>.

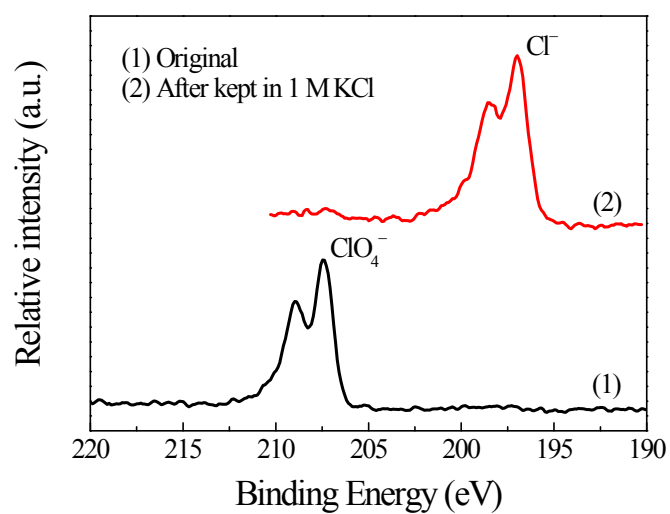

Fig. S5 Cl2p spectra of the original GO/PPy composite and GO/PPy composites after keeping in 1 M KCl solution for at least one day.

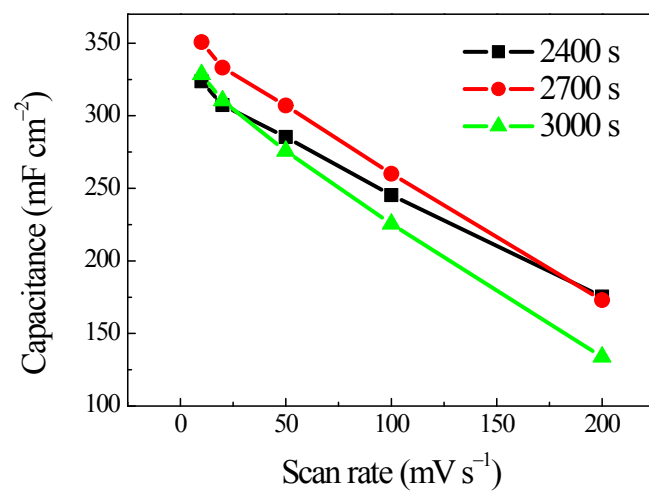

Fig. S6 Comparison of plots of area capacitance vs. scan rate for GO/PPy-2400, -2700 and -3000 s composite electrodes.

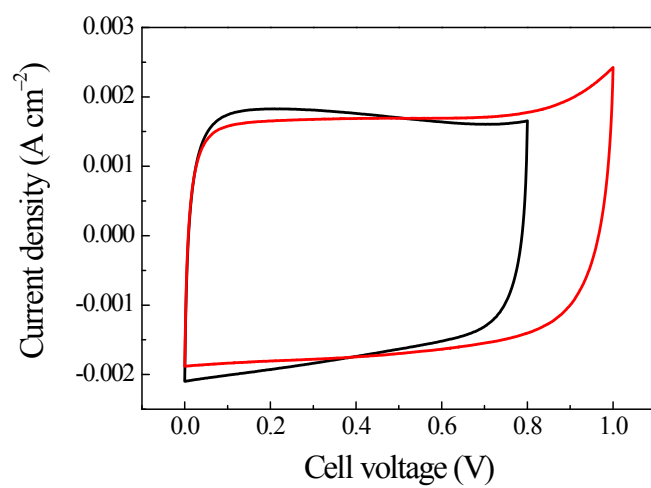

Fig. S7 CV curves of aqueous supercapacitor with cell voltage of 0.8 and 1.0 V (scan rate: 10 mV s<sup>-1</sup>).

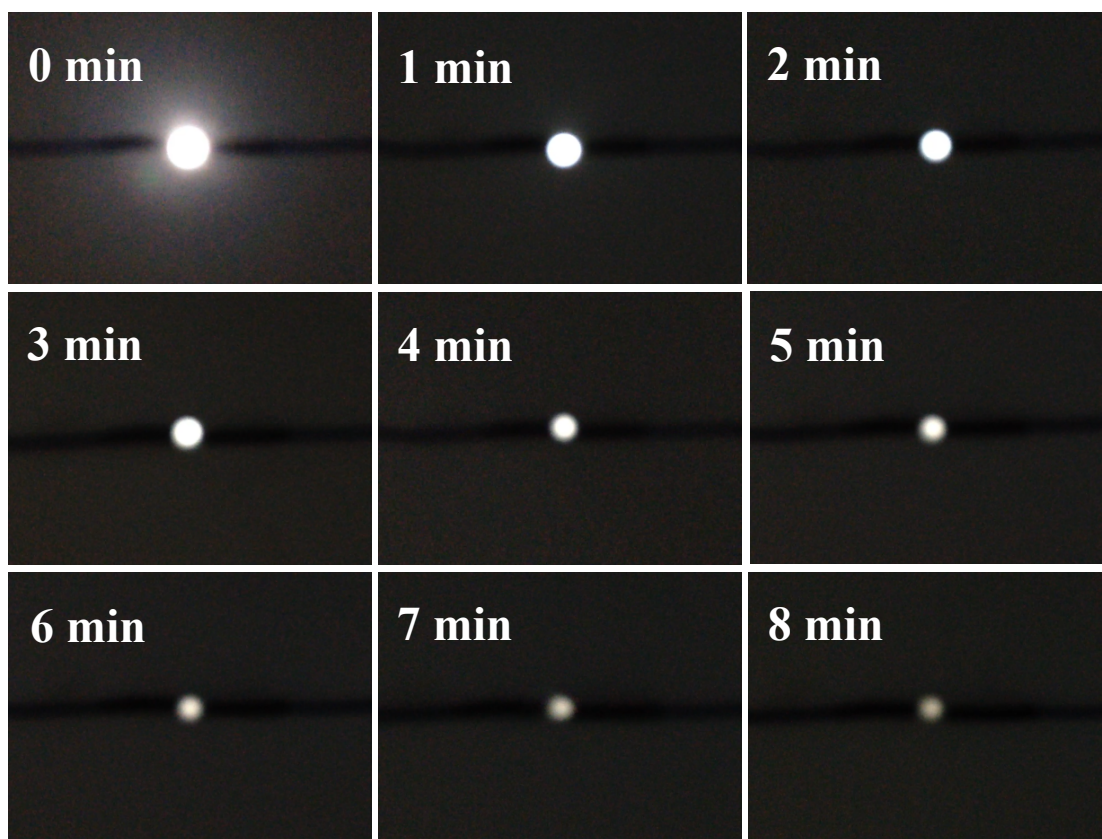

Fig. S8 Photos for the LED powered by four unit solid-state capacitors in series at different times.

## Supplementary Tables

Table S1 Comparison of the mass loading, area and specific capacitances of various graphene/PPy composite electrodes.

| Composites   | Mass loading<br>(mg cm <sup>-2</sup> ) | Area capacitance<br>(mF cm <sup>-2</sup> ) | Specific capacitance<br>(F g <sup>-1</sup> ) | Reference     |
|--------------|----------------------------------------|--------------------------------------------|----------------------------------------------|---------------|
| Graphene/PPy | -                                      | -                                          | 165 at 1 A g <sup>-1</sup>                   | 1             |
| Graphene/PPy | 0.16                                   | -                                          | 424 at 1 A g <sup>-1</sup>                   | 2             |
| Graphene/PPy | -                                      | -                                          | 248 at 0.3 A g <sup>-1</sup>                 | 3             |
| Graphene/PPy | 1.7                                    | 175 at 10 mV s <sup>-1</sup>               | -                                            | 4             |
| Graphene/PPy | -                                      | -                                          | 345 at 1 A g <sup>-1</sup>                   | 5             |
| GO/PPy       | -                                      | -                                          | 332.6 at 0.25 A g <sup>-1</sup>              | 6             |
| GO/PPy       | -                                      | -                                          | 356 at 0.5 A g <sup>-1</sup>                 | 7             |
| GO/PPy       | -                                      | 152.5 at 10 mV s <sup>-1</sup>             | -                                            | 8             |
| GO/PPy       | 0.26                                   | 116 at 10 mV s <sup>-1</sup>               | 481.1 at 0.77A g <sup>-1</sup>               | Present study |
|              |                                        | 94 at 200 mV s <sup>-1</sup>               | 410.4 at 38.5 A g <sup>-1</sup>              |               |
|              | 1.02                                   | 350 at 10 mV s <sup>-1</sup>               | 380.0 at 0.2 A g <sup>-1</sup>               |               |
|              |                                        | 173 at 200 mV s <sup>-1</sup>              | 315.9 at 10 A g <sup>-1</sup>                |               |

All the capacitances are single electrode capacitance.

Table S2 Elemental analysis results of GO/PPy composite electrodes deposited in electrolyte with different GO concentration (the deposition time is 2100 s).

| Concentration of GO<br>(mg mL <sup>-1</sup> ) | Wt. % |       |       |       |       |       |
|-----------------------------------------------|-------|-------|-------|-------|-------|-------|
|                                               | N     | C     | H     | O     | PPy   | GO    |
| 0.1                                           | 15.31 | 53.05 | 3.400 | 28.24 | 72.90 | 27.10 |
| 0.4                                           | 14.56 | 50.16 | 3.166 | 32.11 | 69.33 | 30.67 |
| 0.8                                           | 14.43 | 50.07 | 3.172 | 32.32 | 68.71 | 31.29 |

## References

1. S. Biswas and L. T. Drzal, *Chem. Mater.*, 2010, **22**, 5667-5671.
2. H.-H. Chang, C.-K. Chang, Y.-C. Tsai and C.-S. Liao, *Carbon*, 2012, **50**, 2331-2336.
3. J. Zhang and X. S. Zhao, *J. Phys. Chem. C*, 2012, **116**, 5420-5426.
4. J. Zhang, P. Chen, B. H. Oh and M. B. Chan-Park, *Nanoscale*, 2013, **5**, 9860-9866.
5. S. Li, C. Zhao, K. Shu, C. Wang, Z. Guo, G. G. Wallace and H. Liu, *Carbon*, 2014, **79**, 554-562.
6. L.-Q. Fan, G.-J. Liu, J.-H. Wu, L. Liu, J.-M. Lin and Y.-L. Wei, *Electrochim. Acta*, 2014, **137**, 26-33.
7. C. Zhu, J. Zhai, D. Wen and S. Dong, *J. Mater. Chem.*, 2012, **22**, 6300.
8. H. Zhou, G. Han, Y. Xiao, Y. Chang and H.-J. Zhai, *J. Power Sources*, 2014, **263**, 259-267.
